# Supplementary material for: Endogenous Interleukin-4 Promotes Tumor Development by Increasing Tumor Cell Resistance to Apoptosis
Source: Oxford University Press journal article supplement (doi:10.1158/0008-5472.can-08-0449), 2008-10-30
Supplement: 00085472can080449-sup-sfig_3.pdf [file 00085472can080449-sup-sfig_3.pdf]

# Supplementary Figure S3

A

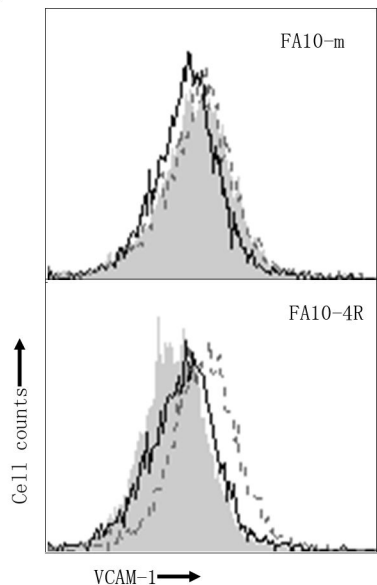

■ Isotype-matched control mAb  
 — PE-anti-VCAM-1, without IL-4  
 ..... PE-anti-VCAM-1, with IL-4

B

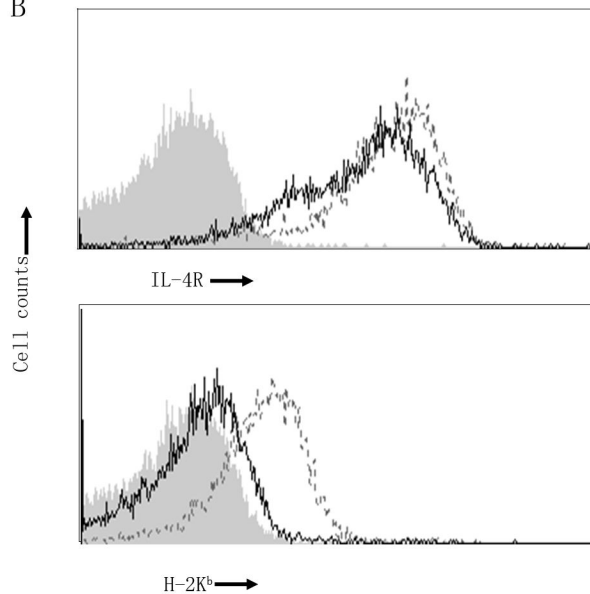

■ Isotype-matched control mAb  
 — Splenocytes cultured without IL-4  
 ..... Splenocytes cultured with IL-4
