# Supplementary figures and images for: Endogenous Interleukin-4 Promotes Tumor Development by Increasing Tumor Cell Resistance to Apoptosis
Source: Oxford University Press journal article supplement (doi:10.1158/0008-5472.can-08-0449), 2008-10-30

# Supplementary Figure S1

A

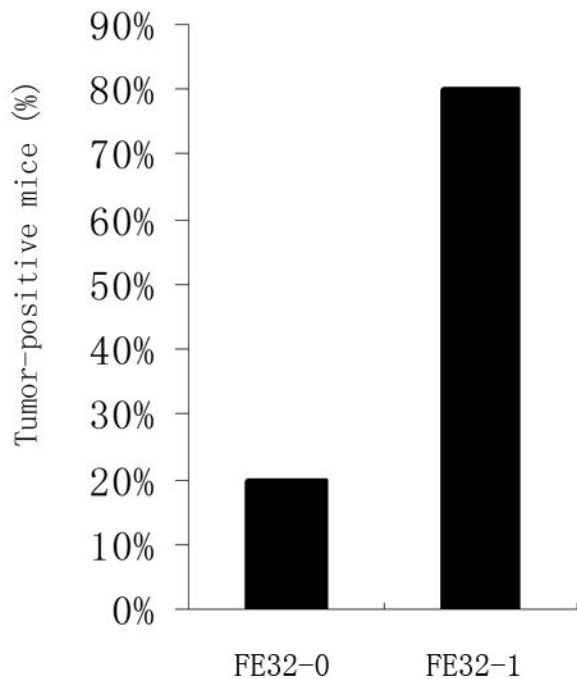

B

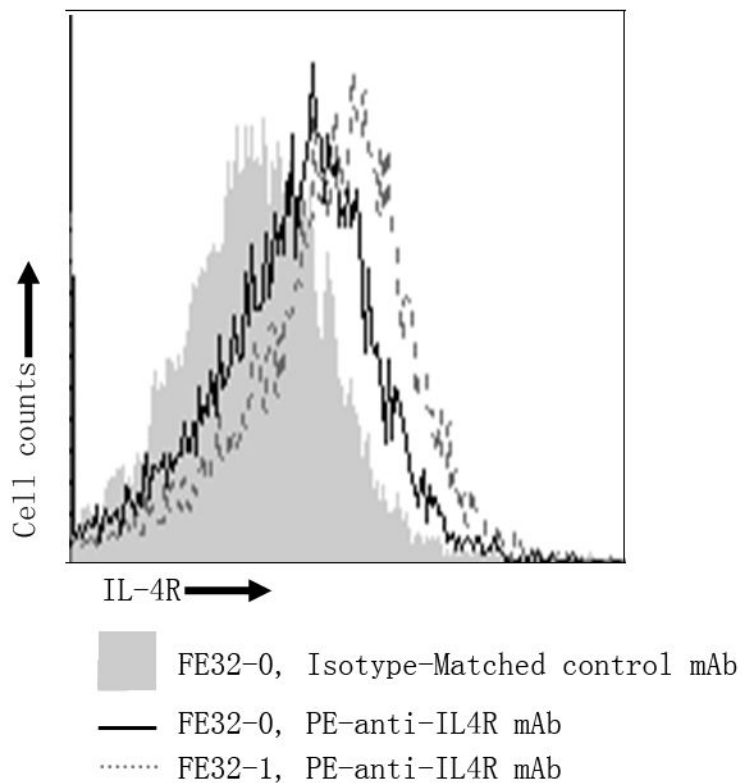

Supplement: 00085472can080449-sup-sfig_1.pdf [file 00085472can080449-sup-sfig_1.pdf]

# Supplementary Figure S2

A

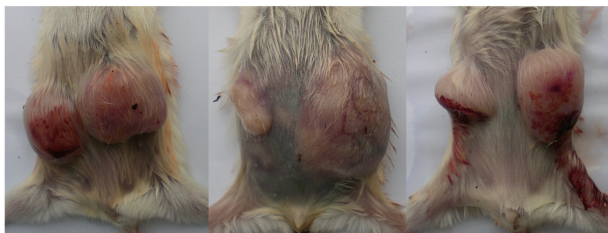

B

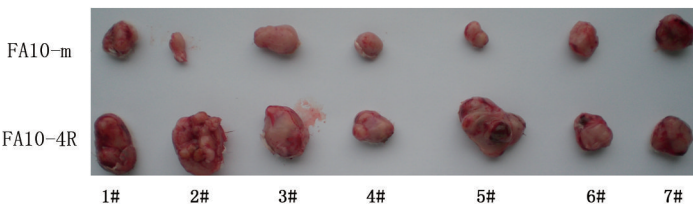

C

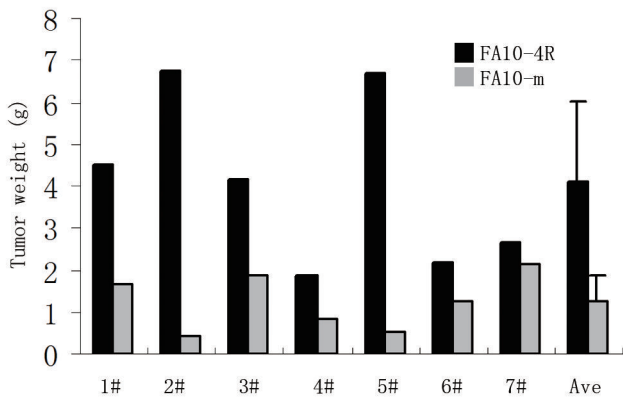

Supplement: 00085472can080449-sup-sfig_2.pdf [file 00085472can080449-sup-sfig_2.pdf]
